# Supplementary material for: Identification of fibroinflammatory and fibrotic transcriptomic subsets of human sclerotic cutaneous chronic graft-versus-host disease
Source: bioRxiv or medRxiv preprint supplement (doi:10.1101/2022.12.07.22283119), 2022-12-08
Supplement: Supplementary file [file media-1.pdf]

|                                              |                         | Unaffected<br>(N=9) | Affected<br>(N=17) |
|----------------------------------------------|-------------------------|---------------------|--------------------|
| <b>Characteristic</b>                        |                         |                     |                    |
| <b>Median age - years</b>                    |                         | 59                  | 52                 |
| <b>Female sex - no. (%)</b>                  |                         | 2 (22)              | 8 (47)             |
| <b>Underlying diagnosis no. (%)</b>          |                         |                     |                    |
|                                              | MDS/AML                 | 2 (22)              | 6 (35)             |
|                                              | CML                     | 1 (11)              | 0                  |
|                                              | ALL                     | 0                   | 3 (18)             |
|                                              | CLL                     | 0                   | 1 (6)              |
|                                              | NHL                     | 3 (33)              | 1 (6)              |
|                                              | HL                      | 0                   | 2 (12)             |
|                                              | MGUS/MM                 | 1 (11)              | 2 (12)             |
|                                              | myelofibrosis           | 1 (11)              | 2 (12)             |
|                                              | sickle cell             | 1 (11)              | 0                  |
| <b>Sex-matched transplant - no. (%)</b>      |                         | 4 (44)              | 5 (29)             |
| <b>HLA-matched transplant - no. (%)</b>      |                         | 8 (89)              | 9 (100)            |
| <b>Time since transplant - (years)</b>       |                         | 6                   | 3.6                |
| <b>Time since sclerosis onset - (months)</b> |                         | N/A                 | 12-18              |
|                                              | late no. (%)            | N/A                 | 8 (47)             |
| <b>History of acute skin GVHD - no. (%)</b>  |                         | 7 (78)              | 7 (41)             |
| <b>Biopsy site</b>                           | arm                     | 3 (33)              | 3 (18)             |
|                                              | abdomen                 | 5 (56)              | 9 (53)             |
|                                              | back                    | 1 (11)              | 2 (12)             |
|                                              | chest                   | 0                   | 1 (6)              |
|                                              | thigh                   | 0                   | 2 (12)             |
| <b>Clinical impression of skin</b>           | Stable                  | N/A                 | 9 (53)             |
|                                              | Worsening               |                     | 6 (35)             |
|                                              | Softening               |                     | 2 (12)             |
| <b>Histology</b>                             | Mild inflammation       | N/A                 | 12 (71)            |
|                                              | Moderate inflammation   | N/A                 | 5 (29)             |
|                                              | Mild necrotic ker.      | N/A                 | 5 (29)             |
|                                              | Moderate necrotic ker.  | N/A                 | 5 (29)             |
| <b>BSA</b>                                   |                         | N/A                 | 42%                |
| <b>Other GVHD organ involvement</b>          | lung                    | 4 (44)              | 12 (71)            |
|                                              | liver                   | 2 (22)              | 11 (65)            |
|                                              | ocular                  | 5 (56)              | 15 (88)            |
|                                              | oral                    | 5 (56)              | 11 (65)            |
|                                              | genital                 | 1 (11)              | 5 (29)             |
|                                              | joint                   | 1 (11)              | 16 (94)            |
|                                              | gastrointestinal        | 2 (22)              | 4 (24)             |
| <b>Current systemic therapy</b>              | none                    | 4 (44)              | 1 (6)              |
|                                              | prednisone              | 5 (56)              | 13 (76)            |
|                                              | ECP                     | 2 (22)              | 8 (47)             |
|                                              | tacrolimus/cyclosporine | 1 (11)              | 5 (29)             |
|                                              | sirolimus               | 0                   | 6 (35)             |
|                                              | etanercept              | 0                   | 1 (6)              |
|                                              | mycophenolate mofetil   | 0                   | 6 (35)             |
|                                              | IVIG                    | 0                   | 1 (6)              |

### Supplementary Table S1: Demographic and clinical characteristics summary.

BSA, Body surface area; MDS, myelodysplastic syndrome; AML, acute myeloid leukemia; CML, chronic myeloid leukemia; NHL, non-Hodgkin's lymphoma; HL, Hodgkin's lymphoma; MGUS, monoclonal gammopathy of undetermined significance; MM, multiple myeloma; ker, keratinocyte; ECP, extracorporeal photopheresis; IVIG, intravenous immunoglobulin.
