# Supplementary material for: Identification of fibroinflammatory and fibrotic transcriptomic subsets of human sclerotic cutaneous chronic graft-versus-host disease
Source: bioRxiv or medRxiv preprint supplement (doi:10.1101/2022.12.07.22283119), 2022-12-08
Supplement: Supplementary file [file media-3.pdf]

| Patient | Disease    | Clinical    | Time since sclerosis | Pathology group | Degree of infiltrate | Necrotic keratinocytes |
|---------|------------|-------------|----------------------|-----------------|----------------------|------------------------|
| U1      | Unaffected | none        | none                 | normal          | unaffected           | none                   |
| U2      | Unaffected | none        | none                 | normal          | unaffected           | none                   |
| U3      | Unaffected | none        | none                 | normal          | unaffected           | none                   |
| U4      | Unaffected | none        | none                 | normal          | unaffected           | none                   |
| U5      | Unaffected | none        | none                 | normal          | unaffected           | none                   |
| U6      | Unaffected | none        | none                 | normal          | unaffected           | none                   |
| U7      | Unaffected | none        | none                 | normal          | unaffected           | none                   |
| U8      | Unaffected | none        | none                 | normal          | unaffected           | none                   |
| U9      | Unaffected | none        | none                 | normal          | unaffected           | none                   |
| A1      | Affected   | stable      | late                 | Scl + epi       | mild                 | mild                   |
| A2      | Affected   | progressive | early                | Scl + epi       | moderate             | mild                   |
| A3      | Affected   | softening   | late                 | Scl + epi       | mild                 | mild                   |
| A4      | Affected   | softening   | early                | Scl + peri      | moderate             | none                   |
| A5      | Affected   | progressive | late                 | Scl + epi       | mild                 | moderate               |
| A6      | Affected   | stable      | late                 | sclerotic       | mild                 | none                   |
| A7      | Affected   | progressive | late                 | Scl + epi       | mild                 | moderate               |
| A8      | Affected   | stable      | early                | sclerotic       | mild                 | none                   |
| A9      | Affected   | stable      | late                 | Scl + peri      | mild                 | none                   |
| A10     | Affected   | stable      | early                | sclerotic       | mild                 | none                   |
| A11     | Affected   | progressive | early                | sclerotic       | mild                 | none                   |
| A12     | Affected   | stable      | late                 | Scl + epi       | mild                 | moderate               |
| A13     | Affected   | stable      | early                | Scl + epi       | moderate             | mild                   |
| A14     | Affected   | stable      | early                | Scl + epi       | mild                 | moderate               |
| A15     | Affected   | stable      | late                 | Scl + epi       | moderate             | none                   |
| A16     | Affected   | progressive | early                | Scl + epi       | moderate             | moderate               |
| A17     | Affected   | progressive | early                | Scl + epi       | mild                 | mild                   |

**Supplementary Table S3: Clinical and histopathologic correlative characteristics of patients.** U (unaffected); A (affected); Clinical: as determined by patient and physician assessment; early (less than 1 year since sclerosis onset); late (greater than 1 year); sclerotic (sclerotic changes without significant inflammation); Scl + peri (sclerotic changes and perivascular inflammation without significant epidermal changes); Scl + epi (sclerotic changes with necrotic keratinocytes, melanophages, and/or interface dermatitis); normal (normal histopathology); for the degree of infiltrate, mild (scattered immune cells either in a perivascular or interface pattern); moderate (a moderate inflammatory cell infiltrate in the dermis and/or a combination of a perivascular and interface inflammatory cell infiltrate); for necrotic keratinocytes, none (no necrotic keratinocytes identified), mild (at least 1 identified in the pathology section), or moderate (multiple identified in the pathology section).
